# Supplementary material for: Practitioner perceptions regarding the practices of soccer substitutes
Source: PLOS journal article supplement (doi:10.1371/journal.pone.0228790), 2020-02-07
Supplement: S1 (10.1371/journal.pone.0228790.s001) [file journal.pone.0228790.s001]

## Question 1 of 12

Please take the time to answer the following questions in relation to your own practices and perceptions.

Please provide as much detail as possible when accounting for your responses.

To what extent do you agree with the following statement? *"Substitutes are an important factor in determining success in soccer match play"* \* *Required*

- ☐ Strongly disagree
- ☐ Disagree
- ☐ Neither agree nor disagree
- ☐ Agree
- ☐ Strongly agree

Please add details to justify your response: \* *Required*

## Question 2 of 12

How frequently does the introduction of substitutes substantially influence the outcome of a match? \*

*Required*

- ☐ Never
- ☐ Rarely
- ☐ Sometimes
- ☐ Often
- ☐ All of the time

Please add details to justify your response: \* *Required*

## Question 3 of 12

For what reasons are substitute players typically introduced into a match (please select all that apply)? \*

*Required*

- ☐ ☐ Change team tactics e.g., formation
- ☐ ☐ Increase the pace of play relative to other players
- ☐ ☐ Replace underperforming/tired players
- ☐ ☐ Replace injured players
- ☐ ☐ Give playing time to youth/returning players
- ☐ ☐ Squad rotation/reduce accumulated fatigue across the squad
- ☐ ☐ Other (please state)

If other, please specify:

# Question 4 of 12

How important do you perceive each of the following reasons to be in inducing the decision to use substitutions? \* *Required*

Please don't select more than 1 answer(s) per row.

Please select at least 7 answer(s).

|                                                     | Not at all important     | Slightly important       | Moderately important     | Very important           | Extremely important      |
|-----------------------------------------------------|--------------------------|--------------------------|--------------------------|--------------------------|--------------------------|
| Change team tactics (e.g., formation)               | <input type="checkbox"/> | <input type="checkbox"/> | <input type="checkbox"/> | <input type="checkbox"/> | <input type="checkbox"/> |
| Increase the pace of play relative to other players | <input type="checkbox"/> | <input type="checkbox"/> | <input type="checkbox"/> | <input type="checkbox"/> | <input type="checkbox"/> |
| Replace underperforming players                     | <input type="checkbox"/> | <input type="checkbox"/> | <input type="checkbox"/> | <input type="checkbox"/> | <input type="checkbox"/> |
| Replace fatigued players                            | <input type="checkbox"/> | <input type="checkbox"/> | <input type="checkbox"/> | <input type="checkbox"/> | <input type="checkbox"/> |
| Replace injured players                             | <input type="checkbox"/> | <input type="checkbox"/> | <input type="checkbox"/> | <input type="checkbox"/> | <input type="checkbox"/> |
| Give playing time to youth/returning players        | <input type="checkbox"/> | <input type="checkbox"/> | <input type="checkbox"/> | <input type="checkbox"/> | <input type="checkbox"/> |
| Squad rotation/reduce fatigue across a squad        | <input type="checkbox"/> | <input type="checkbox"/> | <input type="checkbox"/> | <input type="checkbox"/> | <input type="checkbox"/> |
| Other (please state)                                | <input type="checkbox"/> | <input type="checkbox"/> | <input type="checkbox"/> | <input type="checkbox"/> | <input type="checkbox"/> |

If other, please specify:

# Question 5 of 12

From the list provided, please identify the two most important and two least important factors in inducing the decision to use substitutions \* Required

Please don't select more than 1 answer(s) per row.

Please select exactly 4 answer(s).

Please don't select more than 2 answer(s) in any single column.

|                                                     | Most important           | Least important          |
|-----------------------------------------------------|--------------------------|--------------------------|
| Change team tactics (e.g., formation)               | <input type="checkbox"/> | <input type="checkbox"/> |
| Increase the pace of play relative to other players | <input type="checkbox"/> | <input type="checkbox"/> |
| Replace underperforming players                     | <input type="checkbox"/> | <input type="checkbox"/> |
| Replace fatigued players                            | <input type="checkbox"/> | <input type="checkbox"/> |
| Replace injured players                             | <input type="checkbox"/> | <input type="checkbox"/> |
| Give playing time to youth/returning players        | <input type="checkbox"/> | <input type="checkbox"/> |
| Squad rotation/reduce fatigue across a squad        | <input type="checkbox"/> | <input type="checkbox"/> |
| Other (please state)                                | <input type="checkbox"/> | <input type="checkbox"/> |

If other, please specify:

## Question 6 of 12

To what extent do you agree with the following statement? *“The role of substitutes is an important consideration during pre-match planning (e.g., discussions at meetings in the days leading up to a match)”*

\* Required

- ☐ Strongly disagree
- ☐ Disagree
- ☐ Neither agree nor disagree
- ☐ Agree
- ☐ Strongly agree

Please add details to justify your response: \* Required

## Question 7 of 12

a. How frequently is the likely timing of substitutions planned in advance of the match kick-off? \* *Required*

- ☐ Never
- ☐ Rarely
- ☐ Sometimes
- ☐ Often
- ☐ All of the time

Please add details to justify your response: \* *Required*

b. If planned, how frequently is the likely timing of substitutions communicated to the players themselves in advance of the match kick-off? \* *Required*

- ☐ Never
- ☐ Rarely
- ☐ Sometimes
- ☐ Often
- ☐ All of the time
- ☐ N/A

Please add details (e.g., when/how players are informed) to justify your response: \* *Required*

c. For players who are not informed prior to kick-off, typically how far in advance of pitch-entry are substitutes informed of when they will be introduced? \* *Required*

- ☐ 00:00-03:59 min
- ☐ 04:00-07:59 min
- ☐ 08:00-11:59 min

- ☐ 12:00-15:59 min
- ☐ 16:00-19:59 min
- ☐ 20:00 min or more
- ☐ N/A

Please add details to justify your response: \* *Required*



## Question 8 of 12

a. How frequently is the identity of the players who are likely to be introduced/replaced planned in advance of the match kick-off? \* *Required*

- ☐ Never
- ☐ Rarely
- ☐ Sometimes
- ☐ Often
- ☐ All of the time

Please add details to justify your response: \* *Required*

b. If planned, how frequently is the identity of the players who are likely to be introduced and/or replaced communicated to the players themselves in advance of the match kick-off? \* *Required*

- ☐ Never
- ☐ Rarely
- ☐ Sometimes
- ☐ Often
- ☐ All of the time
- ☐ N/A

Please add details (e.g., when/how players are informed) to justify your response: \* *Required*

## Question 9 of 12

How important do you consider each of the following contextual factors to be in inducing the decision to make a substitution during a match? \* *Required*

Please don't select more than 1 answer(s) per row.

Please select at least 8 answer(s).

|                                                                                                     | Not at all important     | Slightly important       | Moderately important     | Very important           | Extremely important      |
|-----------------------------------------------------------------------------------------------------|--------------------------|--------------------------|--------------------------|--------------------------|--------------------------|
| Scoreline (team winning)                                                                            | <input type="checkbox"/> | <input type="checkbox"/> | <input type="checkbox"/> | <input type="checkbox"/> | <input type="checkbox"/> |
| Scoreline (team losing)                                                                             | <input type="checkbox"/> | <input type="checkbox"/> | <input type="checkbox"/> | <input type="checkbox"/> | <input type="checkbox"/> |
| Scoreline (scores level)                                                                            | <input type="checkbox"/> | <input type="checkbox"/> | <input type="checkbox"/> | <input type="checkbox"/> | <input type="checkbox"/> |
| Time played in a match (e.g., 60 min of play)                                                       | <input type="checkbox"/> | <input type="checkbox"/> | <input type="checkbox"/> | <input type="checkbox"/> | <input type="checkbox"/> |
| Relative quality of opposition (higher standard of opposition)                                      | <input type="checkbox"/> | <input type="checkbox"/> | <input type="checkbox"/> | <input type="checkbox"/> | <input type="checkbox"/> |
| Relative quality of opposition (lower standard of opposition)                                       | <input type="checkbox"/> | <input type="checkbox"/> | <input type="checkbox"/> | <input type="checkbox"/> | <input type="checkbox"/> |
| Relative quality of opposition (similar standard of opposition)                                     | <input type="checkbox"/> | <input type="checkbox"/> | <input type="checkbox"/> | <input type="checkbox"/> | <input type="checkbox"/> |
| Amount of activity performed by a player in the match (e.g., using Global Positioning Systems data) | <input type="checkbox"/> | <input type="checkbox"/> | <input type="checkbox"/> | <input type="checkbox"/> | <input type="checkbox"/> |
| Other (please state)                                                                                | <input type="checkbox"/> | <input type="checkbox"/> | <input type="checkbox"/> | <input type="checkbox"/> | <input type="checkbox"/> |

If other, please specify:

## Question 10 of 12

From the list provided, please identify the two most important and two least important factors in inducing the decision to make a substitution during a match

Please don't select more than 1 answer(s) per row.

Please select exactly 4 answer(s).

Please don't select more than 2 answer(s) in any single column.

|                                                                                                     | Most important           | Least important          |
|-----------------------------------------------------------------------------------------------------|--------------------------|--------------------------|
| Scoreline (team winning)                                                                            | <input type="checkbox"/> | <input type="checkbox"/> |
| Scoreline (team losing)                                                                             | <input type="checkbox"/> | <input type="checkbox"/> |
| Scoreline (scores level)                                                                            | <input type="checkbox"/> | <input type="checkbox"/> |
| Time played in the match (e.g., 60 min of play)                                                     | <input type="checkbox"/> | <input type="checkbox"/> |
| Relative quality of opposition (higher standard of opposition)                                      | <input type="checkbox"/> | <input type="checkbox"/> |
| Relative quality of opposition (lower standard of opposition )                                      | <input type="checkbox"/> | <input type="checkbox"/> |
| Relative quality of opposition (similar standard of opposition)                                     | <input type="checkbox"/> | <input type="checkbox"/> |
| Amount of activity performed by a player in the match (e.g., using Global Positioning Systems data) | <input type="checkbox"/> | <input type="checkbox"/> |
| Other (please state)                                                                                | <input type="checkbox"/> | <input type="checkbox"/> |

If other, please specify:

## Question 11 of 12

a. How many substitutions do you believe should be permitted during a competitive (i.e., non-friendly) 90 min match? \* *Required*

- ☐ 0
- ☐ 1
- ☐ 2
- ☐ 3
- ☐ 4
- ☐ 5
- ☐ 6
- ☐ 7
- ☐ 8
- ☐ 9
- ☐ 10
- ☐ 11+

Please add details to justify your response: \* *Required*

b. How many *additional* substitutions do you believe should be permitted when competitive (i.e, non-friendly) matches progress to extra-time? \* *Required*

- ☐ 0
- ☐ 1
- ☐ 2
- ☐ 3
- ☐ 4
- ☐ 5
- ☐ 6
- ☐ 7
- ☐ 8
- ☐ 9

- ☐ 10
- ☐ 11+

Please add details to justify your response: \* *Required*

# Question 12 of 12

How important do you consider the following as areas for future research in relation to substitutes? \*

*Required*

Please don't select more than 1 answer(s) per row.

Please select at least 7 answer(s).

|                       | Not at all important     | Slightly important       | Moderately important     | Very important           | Extremely important      |
|-----------------------|--------------------------|--------------------------|--------------------------|--------------------------|--------------------------|
| Fatigue responses     | <input type="checkbox"/> | <input type="checkbox"/> | <input type="checkbox"/> | <input type="checkbox"/> | <input type="checkbox"/> |
| Tactical impact       | <input type="checkbox"/> | <input type="checkbox"/> | <input type="checkbox"/> | <input type="checkbox"/> | <input type="checkbox"/> |
| Substitution timing   | <input type="checkbox"/> | <input type="checkbox"/> | <input type="checkbox"/> | <input type="checkbox"/> | <input type="checkbox"/> |
| Technical performance | <input type="checkbox"/> | <input type="checkbox"/> | <input type="checkbox"/> | <input type="checkbox"/> | <input type="checkbox"/> |
| Physical performance  | <input type="checkbox"/> | <input type="checkbox"/> | <input type="checkbox"/> | <input type="checkbox"/> | <input type="checkbox"/> |
| Injury epidemiology   | <input type="checkbox"/> | <input type="checkbox"/> | <input type="checkbox"/> | <input type="checkbox"/> | <input type="checkbox"/> |
| Psychological impact  | <input type="checkbox"/> | <input type="checkbox"/> | <input type="checkbox"/> | <input type="checkbox"/> | <input type="checkbox"/> |
| Other (please state)  | <input type="checkbox"/> | <input type="checkbox"/> | <input type="checkbox"/> | <input type="checkbox"/> | <input type="checkbox"/> |

If other, please specify:
